# Supplementary material for: Inter-connected and open pore hierarchical TS-1 with controlled framework titanium for catalytic cyclohexene epoxidation
Source: Royal Society of Chemistry journal article supplement (doi:10.1039/c7cy02571h), 2018-01-01
Supplement: c7cy02571h1.pdf [file c7cy02571h1.pdf]

Supporting Information

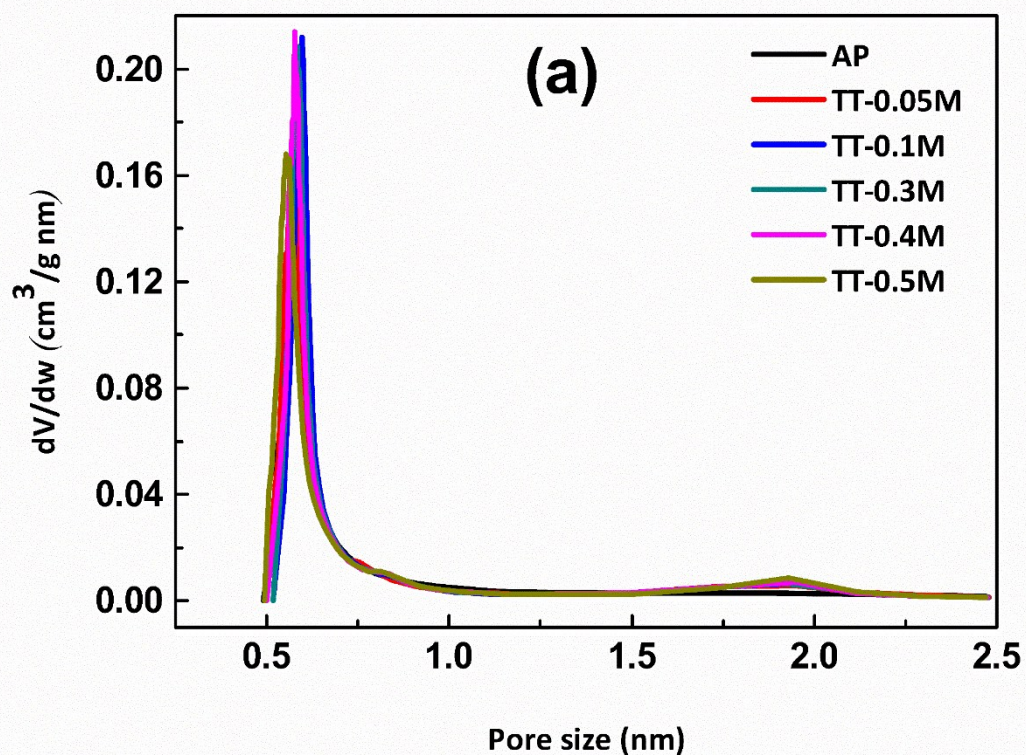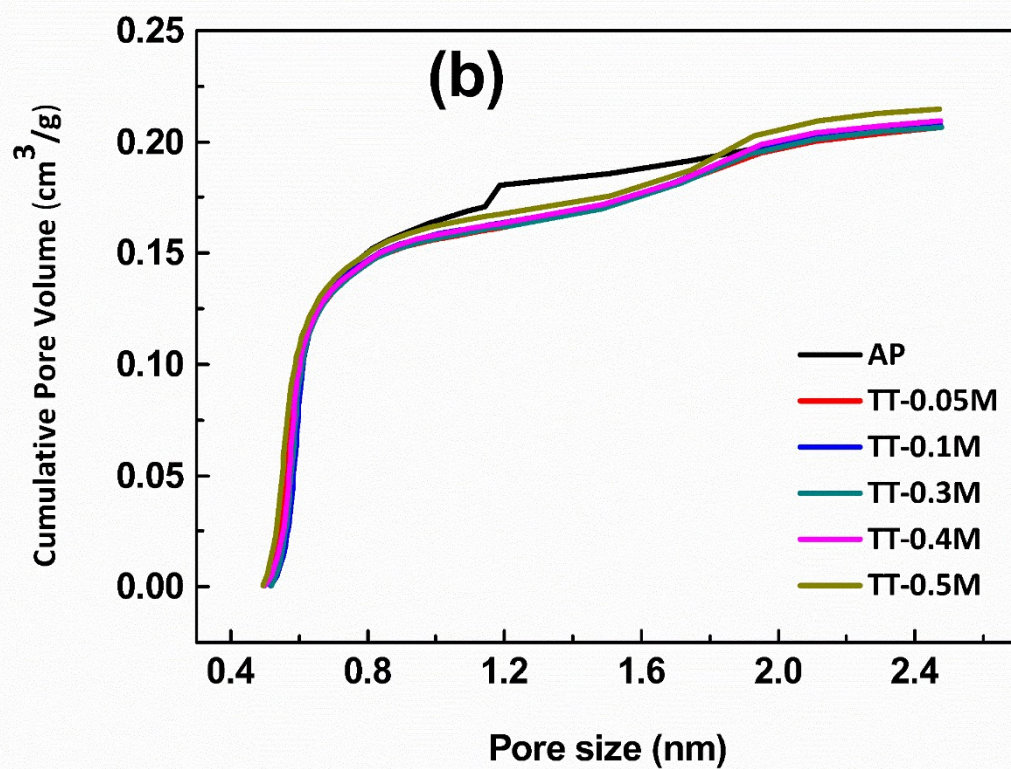

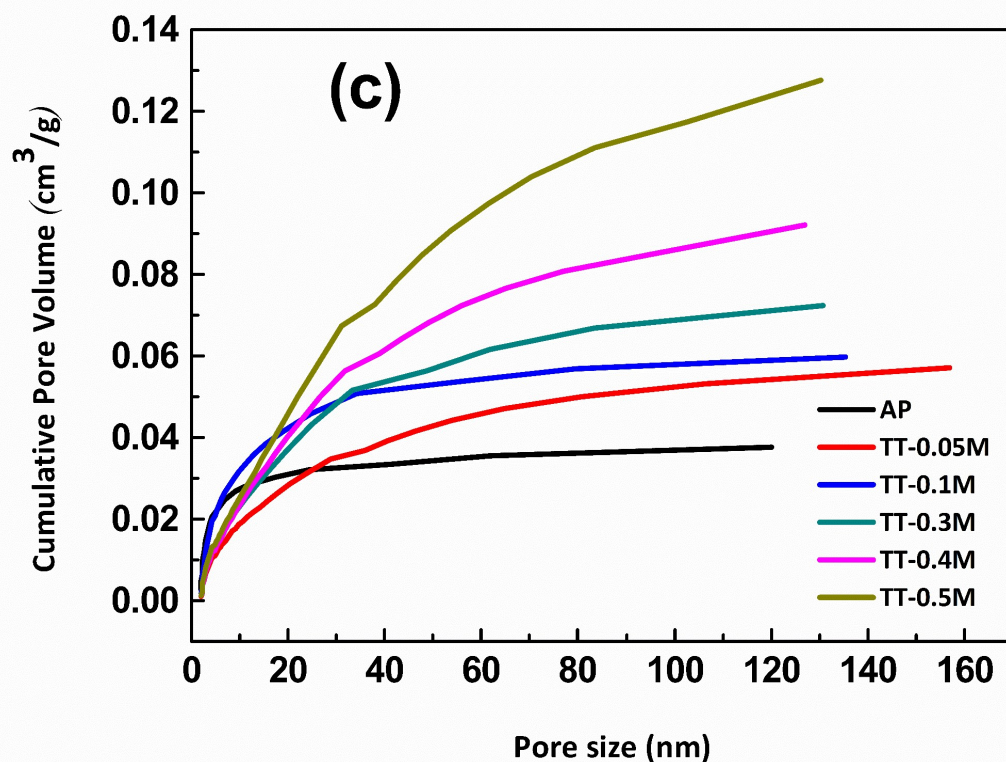

Figure S1. Pore size distribution of as prepared and TPAOH treated samples (a) H-K differential Pore Volume Plot, (b) H-K cumulative pore volume and (c) BJH cumulative pore volume

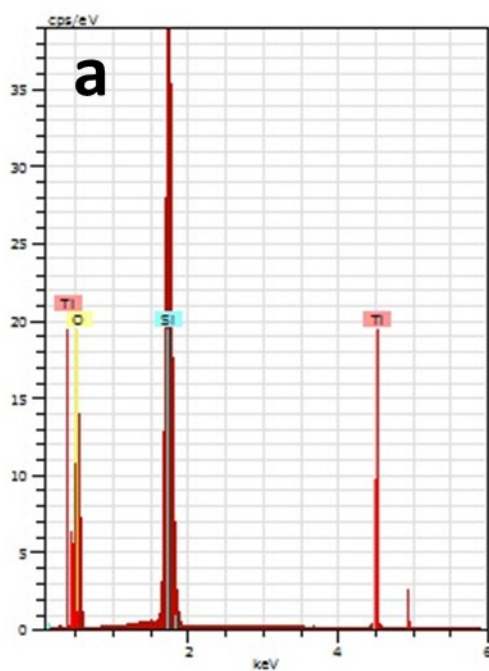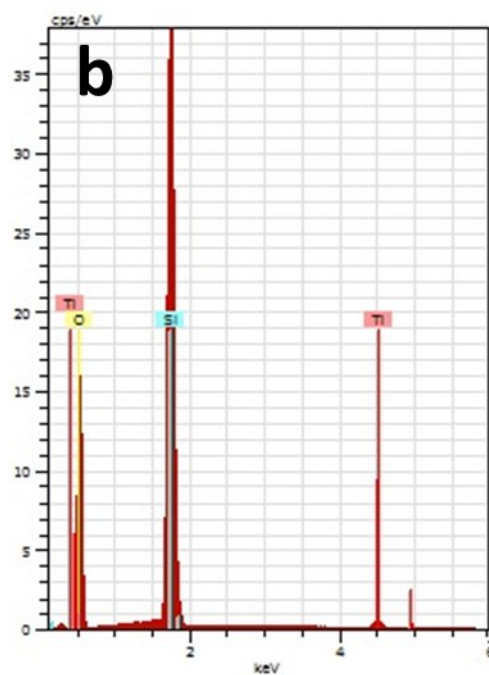

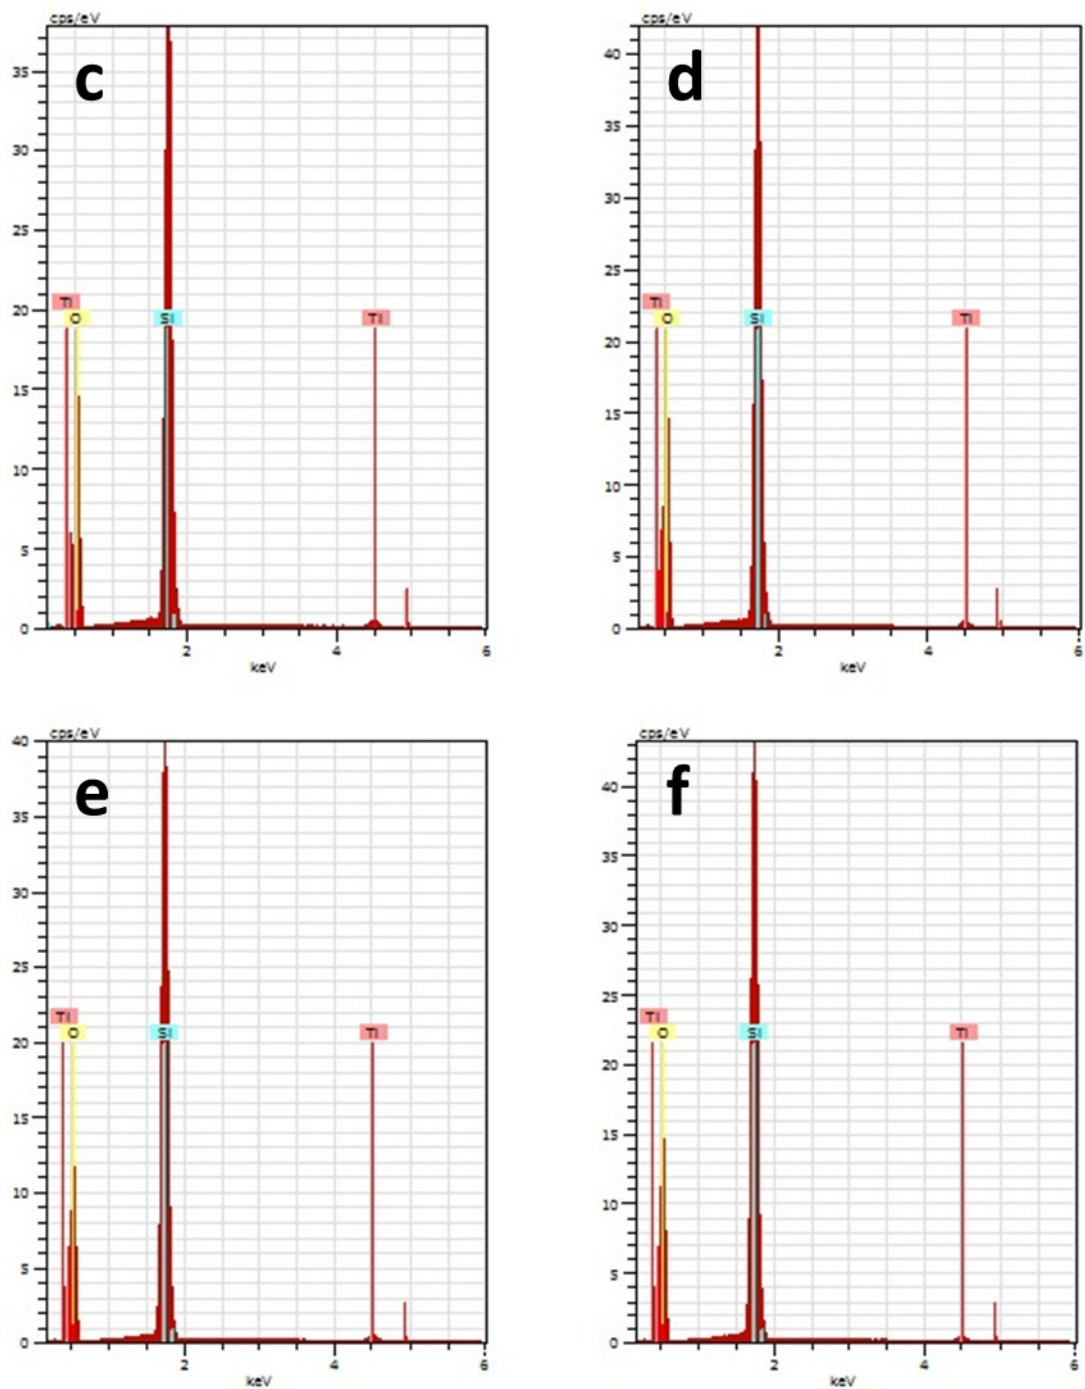

Figure S2. EDS patterns of as prepared and TPAOH treated samples (a) as prepared TS-1, (b) TT-0.05M, (c) TT-0.1M, (d) TT-0.3M, (e) TT-0.4M and (f) TT-0.5M.

Table S1. Summary of the elements distribution of as-prepared (AP) and TPAOH modified (TT-XM) TS-1 samples.

| Elements* | AP    | TT-0.05M | TT-0.1M | TT-0.3M | TT-0.4M | TT-0.5M |
|-----------|-------|----------|---------|---------|---------|---------|
| O         | 66.54 | 68.10    | 67.39   | 69.18   | 63.58   | 66.17   |
| Si        | 32.75 | 31.15    | 31.89   | 30.11   | 35.59   | 33.07   |
| Ti        | 0.71  | 0.75     | 0.72    | 0.71    | 0.84    | 0.76    |

\* The elements were calculated by atom (at. %)

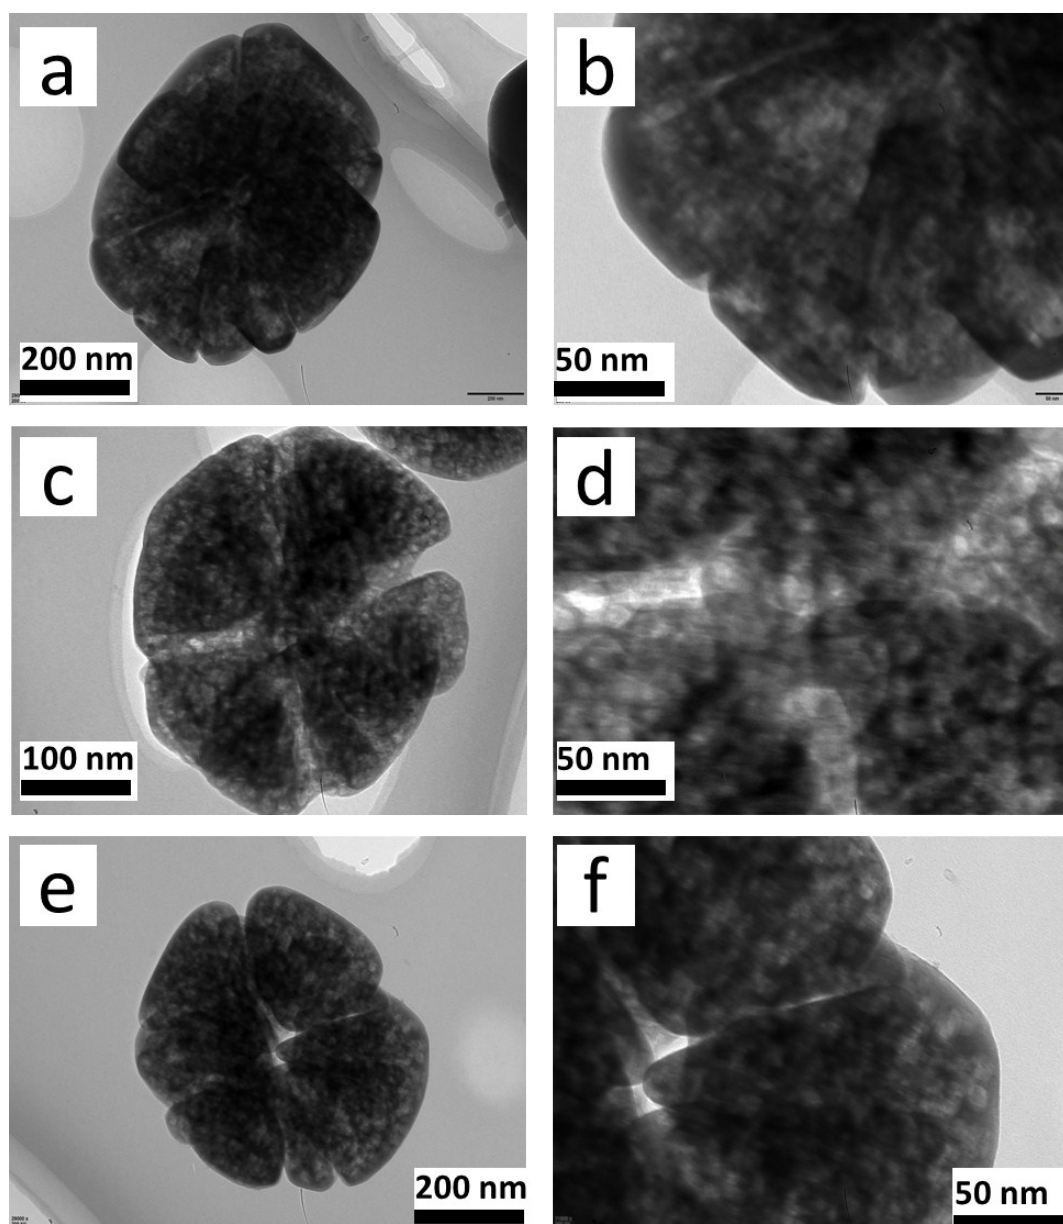

Figure S3 TEM image of sample TT-0.45M (a & b), TT-0.5M (c & d) and TT-0.6M (e & f)

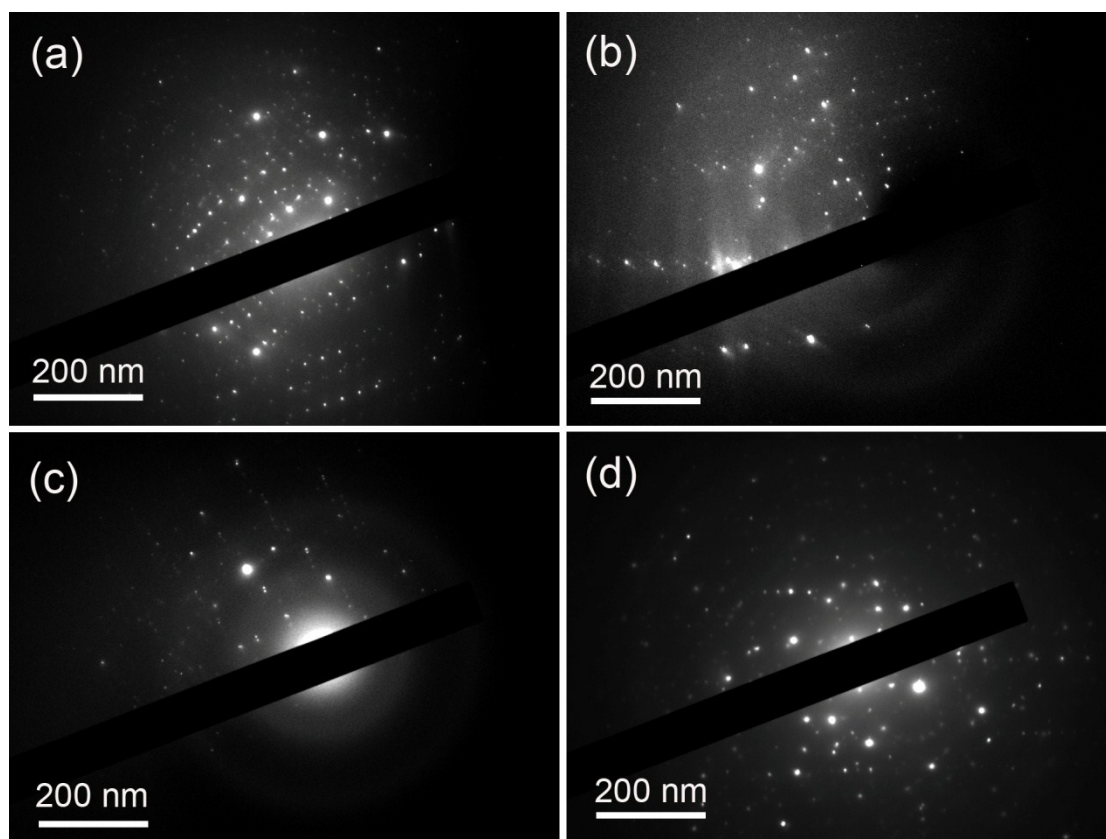

Figure S4. SAED patterns of as prepared and TPAOH treated samples (a) as prepared TS-1, (b) TT-0.1M, (c) TT-0.4M and (d) TT-0.5 M
